# Supplementary material
Source: Springer Nature journal article supplement (https://www.springermedizin.de/resource/supplementary/12935_2005_142_MOESM5_ESM.pdf/9541226)
Supplement: MOESM5 [file 9541226]

Possible effect  
of  
chemotherapy  
treatment

```
graph TD; A[Possible effect of chemotherapy treatment] --> B[Necrosis]; A --> C[Apoptosis]; A --> D[Physiology modification]; A --> E[Morphology alteration];
```

Necrosis

Apoptosis

Physiology  
modification

Morphology  
alteration
